# Supplementary material
Source: publisher figshare collection journal article supplement (https://acs.figshare.com/ndownloader/files/3846097)
Supplement: Supplementary file 1 [file 3846097]

## **Supplementary Information**

### **Metabolite Profiling of the Response of Burdock Roots to Copper Stress**

Youngae Jung<sup>1</sup>, Miyoung Ha<sup>1,2</sup>, Jueun Lee<sup>1,3</sup>, Yun Gyong Ahn<sup>1</sup>, Jong Hwan Kwak<sup>4</sup>,  
Do Hyun Ryu<sup>3\*</sup> and Geum-Sook Hwang<sup>1,5\*</sup>

<sup>1</sup>Integrated Metabolomics Research Group, Western Seoul Center, Korea Basic Science Institute, Seoul 120-140, Republic of Korea

<sup>2</sup>Nonghyup Food Safety Research Institute, Seoul 137-130, Republic of Korea

<sup>3</sup>Department of Chemistry, Sungkyunkwan University, Suwon 440-746, Republic of Korea

<sup>4</sup>Department of Pharmacy, Sungkyunkwan University, Suwon 440-746, Republic of Korea

<sup>5</sup>Graduate School of Analytical Science and Technology, Chungnam National University, Daejeon 305-764, Republic of Korea

\* Corresponding Authors

Geum-Sook Hwang: Korea Basic Science Institute, Seoul 120-140, Korea. Phone: +82-2-6908-6200. Fax: +82-2-6908-6239. E-mail: gshwang@kbsi.re.kr.

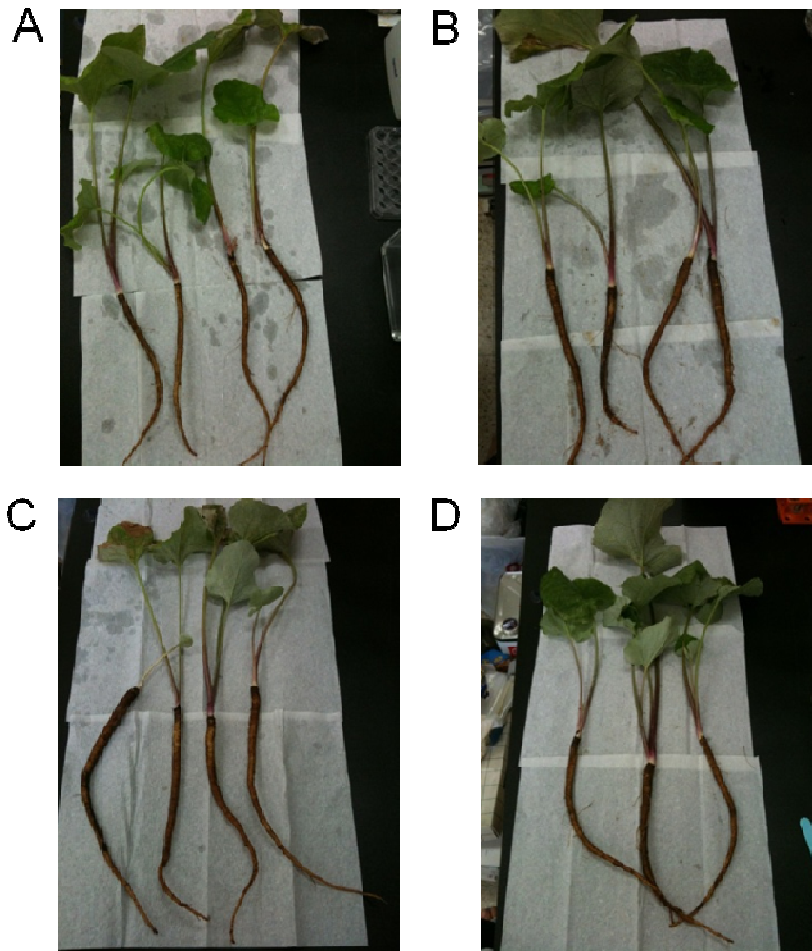

**Figure S1.** Pictures of burdock roots following (a) incubation in DW for 1 day, (B) incubation in 100  $\mu\text{M}$   $\text{CuCl}_2$  for 1 day, (C) incubation in DW for 6 days and (D) incubation in 100  $\mu\text{M}$   $\text{CuCl}_2$  for 6 days.
